# Supplementary material
Source: publisher figshare collection journal article supplement (https://gsajournals.figshare.com/ndownloader/files/23268713)
Supplement: Supplementary file 1 [file 23268713]

## Sheet: Checking for parents full data 
Table S4. Comparison of genome-wide single nucleotide polymorphism (SNPs) between near-isogenic lines and parent genotypes, based as a percentage/100, excluding SNPs in common with recurrent parent B73.
	10NN0001	10NN0003	10NN0005	10NN0007	10NN0009	10NN0011	10NN0013	10NN0015	10NN0017	10NN0019	10NN0021	10NN0023	10NN0025	10NN0027	10NN0031	10NN0033	10NN0035	10NN0037	10NN0039	10NN0041	10NN0043	10NN0045	10NN0047	10NN0049	10NN0051	10NN0053	10NN0055	10NN0057	10NN0059	10NN0061	10NN0065	10NN0065a	10NN0067	10NN0069	10NN0071	10NN0073	10NN0075	10NN0077	10NN0079	10NN0081	10NN0085	10NN0087	10NN0089	10NN0091	10NN0093	10NN0095	10NN0097	10NN0099	10NN0101
B73	0	0	0	0	0	0	0	0	0	0	0	0	0	0	0	0	0	0	0	0	0	0	0	0	0	0	0	0	0	0	0	0	0	0	0	0	0	0	0	0	0	0	0	0	0	0	0	0	0
B97	0.00421685	0.00278961	0.00302504	0.00967259	0.00529042	0.00396363	0.00365914	0.00416872	0.0030512	0.00386841	0.00594963	0.00631062	0.00366541	0.00295179	0.00273415	0.00649688	0.0028482	0.00422836	0.00320187	0.00188241	0.00236374	0.00392282	0.00457261	0.00534169	0.00571001	0.00239931	0.00341533	0.00582511	0.00450774	0.00223713	0.00377214	0.00475887	0.00267137	0.00381609	0.00405989	0.00735385	0.00336197	0.00379412	0.00475259	0.00324687	0.00330756	0.00372192	0.00213668	0.00370936	0.00434974	0.00369262	0.0050236	0.00403164	0.0044753
CML103	0.00899978	0.00390713	0.00296854	0.0203371	0.00957214	0.0041593	0.00581255	0.00449727	0.00384016	0.00508742	0.0126286	0.00684322	0.00376796	0.0048771	0.00371878	0.00687985	0.00411954	0.00451506	0.00513242	0.00220678	0.00226329	0.00692484	0.00558235	0.0112693	0.012549	0.00310979	0.00584708	0.011193	0.00815746	0.00215551	0.00401281	0.00503615	0.00265149	0.00401281	0.00408605	0.00901129	0.00350427	0.00497755	0.00489594	0.00343521	0.00356706	0.00419383	0.00210529	0.00393538	0.00464795	0.00381714	0.0109261	0.00394375	0.0048792
CML228	0.00518892	0.00282623	0.00335046	0.0103203	0.00519101	0.00449518	0.00396677	0.00505394	0.00280007	0.00430579	0.00711423	0.00701169	0.00368216	0.00309933	0.00278542	0.00750976	0.00306794	0.00470759	0.00343103	0.00200065	0.00245686	0.0039563	0.00490431	0.00597788	0.00641945	0.0024621	0.0036832	0.00642572	0.00470759	0.00246	0.00677939	0.00954912	0.00367693	0.00720003	0.00628028	0.0180435	0.00604903	0.00924882	0.00884387	0.00562212	0.00591405	0.00733711	0.00222039	0.00631062	0.00474526	0.0059423	0.00561688	0.00699181	0.00848497
CML247	0.00499953	0.002618	0.00310038	0.00974584	0.0055248	0.00419906	0.00388201	0.00435497	0.00279484	0.00421057	0.00701378	0.0065764	0.00344463	0.00286913	0.00265463	0.0067344	0.00296226	0.00457052	0.00323431	0.00186253	0.00228107	0.00390503	0.00448681	0.00548504	0.00582825	0.00239617	0.00359426	0.00624261	0.00468667	0.00215656	0.00414674	0.00512509	0.00265463	0.00422208	0.00392805	0.00903326	0.00339545	0.00501209	0.00504871	0.00326256	0.00349486	0.0040442	0.00198286	0.00373971	0.00775251	0.0038433	0.0052946	0.0039427	0.00479339
CML277	0.00522868	0.00287646	0.0033829	0.0107148	0.00559282	0.00458726	0.0040735	0.00475468	0.00288587	0.00456319	0.00729002	0.00709435	0.00389038	0.00301562	0.00282832	0.00709435	0.00314014	0.00471283	0.00345928	0.00198914	0.00235432	0.00396049	0.00437694	0.00587115	0.00619343	0.00243594	0.00358903	0.00678253	0.00486873	0.00223922	0.004446	0.00550597	0.00273938	0.00400548	0.00424405	0.00933671	0.00353253	0.00516799	0.00527158	0.00347707	0.00350846	0.00413942	0.00208331	0.00393328	0.00484781	0.00394689	0.00547249	0.00411117	0.00487292
CML322	0.00510731	0.00265986	0.0031213	0.0104009	0.00542121	0.00464586	0.00360159	0.00441147	0.00276763	0.00422627	0.00657012	0.00663918	0.00352834	0.00258138	0.00276868	0.00698344	0.00292877	0.00432044	0.00334732	0.00192217	0.00233862	0.00392073	0.00444914	0.00549341	0.00589626	0.00245163	0.00339545	0.00662663	0.00467725	0.00205401	0.00428591	0.00513032	0.00258871	0.00413837	0.00396677	0.00885015	0.00335988	0.00517846	0.00483734	0.00348649	0.00357543	0.00413	0.00201634	0.00395212	0.00449832	0.00374598	0.00521403	0.00388411	0.00472643
CML333	0.00513765	0.0027352	0.00326361	0.0101016	0.00532809	0.00451506	0.00396572	0.00484571	0.00284716	0.00436752	0.00691542	0.00644247	0.00335569	0.00299783	0.00267346	0.00726491	0.00291517	0.0047484	0.00341638	0.00193787	0.0025751	0.00386527	0.00461028	0.00604485	0.00638282	0.00255313	0.00369053	0.00576233	0.00515753	0.00217644	0.0043895	0.00543063	0.00268811	0.00416976	0.00432253	0.009569	0.00296749	0.00542854	0.00537517	0.00359949	0.00387992	0.00432567	0.00219737	0.00399607	0.00460714	0.00404106	0.00555829	0.00393538	0.00502046
CML52	0.00505708	0.00255941	0.00310456	0.00914941	0.00475049	0.00400653	0.0034237	0.0044753	0.00244849	0.00378679	0.00623738	0.0064749	0.00347916	0.00261591	0.00251965	0.00637131	0.0027917	0.00459459	0.00296226	0.00155594	0.00219632	0.00350637	0.00423045	0.00514393	0.00542331	0.00212726	0.00321757	0.00592556	0.00460191	0.00181126	0.0043309	0.00503615	0.00228421	0.00407977	0.00361937	0.00965794	0.00307108	0.00526635	0.00477665	0.0029225	0.00365495	0.00423568	0.00183532	0.00357124	0.00455587	0.00342056	0.00483316	0.00371669	0.00453076
CML69	0.0051523	0.00267869	0.00323536	0.0103726	0.00519311	0.00427231	0.00384853	0.00486141	0.00272683	0.00419383	0.00692903	0.006906	0.00378784	0.00305643	0.0028074	0.00684741	0.00307317	0.00471806	0.0030941	0.00188764	0.00241605	0.0040306	0.00465214	0.00603961	0.0064477	0.00239513	0.00339127	0.00644665	0.0050937	0.00211575	0.00413419	0.00529774	0.00249035	0.00454331	0.00418546	0.00942356	0.00367797	0.00535948	0.00519311	0.00416244	0.00368843	0.0042315	0.00204669	0.0038433	0.00453494	0.00397409	0.00572152	0.00412163	0.00510626
HP301	0.00487397	0.00282414	0.003453	0.00949262	0.00448262	0.00425556	0.00373238	0.00440415	0.00290889	0.00437485	0.00660884	0.0066057	0.00373866	0.00291726	0.00274148	0.00586906	0.00305329	0.00455901	0.00357229	0.00206971	0.00251755	0.00378889	0.00439996	0.00599881	0.00624575	0.0023449	0.00359531	0.0061746	0.00446379	0.00229886	0.00412058	0.0050079	0.00271427	0.00402013	0.00423987	0.00883027	0.00347184	0.00504243	0.0048206	0.00347707	0.00370622	0.00425347	0.00221725	0.00363926	0.00451506	0.0039134	0.0056556	0.00390608	0.00389248
Il14H	0.00471492	0.002618	0.00297691	0.00922161	0.00504766	0.00399816	0.00358484	0.0042158	0.00269962	0.00404838	0.0066622	0.00594544	0.00348649	0.0027195	0.00256882	0.00639747	0.00296016	0.00446798	0.00347916	0.00191589	0.00238048	0.00352102	0.00446065	0.00552062	0.00559177	0.00229258	0.00321862	0.00546935	0.00428382	0.00209587	0.003611	0.00455168	0.00252174	0.00385376	0.00402536	0.00798795	0.00306166	0.00479549	0.00441147	0.00331697	0.00325105	0.00361414	0.00204146	0.00350951	0.00426603	0.00381609	0.00502255	0.00381818	0.0041865
Ki11	0.00513974	0.00278019	0.00321548	0.010314	0.00512928	0.00447112	0.00390085	0.00473375	0.00278751	0.00437694	0.00692798	0.0066779	0.00368216	0.00296644	0.00273101	0.00730153	0.00296226	0.00451192	0.00360891	0.00193682	0.0024171	0.00392177	0.00465004	0.00591196	0.00629284	0.00245477	0.0036832	0.00659628	0.00475154	0.00217644	0.00451506	0.00560747	0.00305434	0.00451925	0.0043016	0.00971235	0.0044188	0.00513346	0.00554992	0.00326884	0.00357647	0.00446379	0.00213668	0.00459877	0.00450669	0.0039563	0.0056127	0.00380877	0.00661198
Ki3	0.00495454	0.00284402	0.00330965	0.00963702	0.00529565	0.00409547	0.00371773	0.00477561	0.00272683	0.00447216	0.0070797	0.00723038	0.003814	0.00291308	0.00280426	0.00695937	0.00308259	0.00453913	0.00331697	0.00202576	0.00242547	0.00408396	0.00432881	0.0057843	0.0062018	0.00254267	0.00355868	0.00604485	0.00478712	0.00216911	0.00495035	0.00603438	0.00271113	0.00482165	0.00528937	0.0113112	0.00364972	0.00647909	0.00534797	0.00353462	0.00361728	0.00408605	0.00214714	0.00416453	0.00457052	0.00431207	0.00535006	0.0042451	0.00584813
Ky21	0.00489699	0.00278228	0.00315374	0.00947064	0.00471701	0.00409129	0.00381609	0.0046469	0.00281891	0.00420115	0.00638806	0.00637445	0.00378365	0.00291517	0.00275612	0.00647804	0.00302713	0.00452343	0.00349904	0.00197554	0.00247465	0.00358066	0.00440206	0.00599881	0.00617041	0.00242652	0.00339964	0.00556143	0.00469504	0.00220364	0.00389771	0.00489071	0.00262219	0.00383702	0.00428172	0.00840649	0.00325524	0.00460819	0.00493152	0.00334104	0.00351474	0.00404106	0.00214819	0.00364972	0.00434137	0.00370308	0.00555619	0.00380458	0.00419487
M162W	0.00490117	0.00272996	0.00322908	0.00979188	0.00512405	0.00418546	0.00350637	0.00451611	0.00271427	0.00410907	0.00641526	0.00659	0.00333895	0.00288273	0.00271427	0.00670615	0.00301981	0.00434764	0.00336511	0.00190543	0.00250604	0.00384853	0.00415825	0.00601241	0.00620075	0.00232921	0.00347184	0.00572152	0.00447949	0.00210005	0.00396781	0.00497337	0.00263475	0.00418232	0.0039856	0.00883132	0.00317572	0.00491791	0.00485618	0.00356915	0.00350846	0.00410175	0.00206552	0.00380563	0.0044188	0.00373866	0.00565978	0.00389561	0.00488024
M37W	0.00497128	0.00278438	0.0032364	0.00988919	0.00520985	0.00407977	0.00365286	0.00444914	0.00267242	0.00410698	0.00713307	0.00676789	0.00355241	0.00302922	0.00268183	0.00715504	0.00314223	0.00435497	0.00339022	0.00184474	0.00233444	0.0038276	0.00421162	0.00603124	0.00642991	0.00242757	0.00370936	0.00634725	0.00444914	0.00215551	0.00432986	0.00524019	0.00245582	0.00387887	0.00386109	0.00838347	0.00341219	0.00495244	0.00488652	0.0033107	0.00358171	0.00420952	0.0020854	0.00363402	0.00427858	0.00379412	0.00584185	0.00380144	0.0049493
MS71	0.00425347	0.00284193	0.00327303	0.00924777	0.00486873	0.00411431	0.00370727	0.00463016	0.00289738	0.00364344	0.00660465	0.00635876	0.00386841	0.00281263	0.00270381	0.00627505	0.00291203	0.0044324	0.00328663	0.00195461	0.00242757	0.00355659	0.00475363	0.00589312	0.0061024	0.00248198	0.0036403	0.00595381	0.00473166	0.0021869	0.00400862	0.00490745	0.00255522	0.00392701	0.00380144	0.00822756	0.00331907	0.00458831	0.004807	0.00303132	0.00362984	0.00417499	0.00217121	0.00343103	0.00409652	0.00376587	0.00537727	0.00392596	0.00440624
Mo17	0.00463853	0.00276554	0.00292145	0.00893909	0.00513242	0.00400967	0.0040149	0.00444914	0.00320606	0.00408501	0.00576651	0.00638596	0.00371145	0.00305329	0.00319769	0.00612856	0.0029633	0.0041028	0.00332639	0.00231351	0.00263579	0.00348649	0.00942984	0.00523601	0.00561793	0.00279798	0.00338603	0.0051366	0.00520148	0.00254685	0.0038276	0.00460296	0.00301981	0.00396677	0.00398142	0.00741768	0.00323954	0.00477142	0.00440519	0.00377738	0.00350951	0.00399816	0.00256778	0.00402432	0.00425138	0.00431835	0.00497965	0.00619134	0.00436752
Mo18W	0.00505185	0.00272892	0.00327617	0.00970922	0.00552899	0.00430265	0.00382237	0.00501104	0.00265463	0.00422417	0.00664651	0.0072105	0.0037125	0.00287646	0.00269753	0.00705982	0.00296121	0.00468353	0.00325629	0.0019567	0.00245163	0.00403792	0.00420325	0.00615053	0.00642049	0.00239513	0.00340905	0.00584604	0.00444077	0.00216807	0.00430056	0.00547562	0.00261173	0.00402327	0.00435078	0.00932101	0.00363926	0.00505185	0.00510312	0.00334523	0.00380667	0.00425242	0.0020875	0.00383074	0.0046333	0.00395526	0.00577488	0.00344149	0.0049064
NC350	0.00519729	0.00284925	0.00332639	0.0106541	0.00536785	0.00465737	0.00382446	0.00471073	0.00287855	0.00436439	0.00708807	0.00753906	0.00400758	0.00322176	0.00286808	0.00746476	0.00322385	0.00470341	0.00355659	0.00197868	0.00254894	0.00416976	0.00478712	0.00597893	0.00623424	0.00249139	0.00344254	0.00661093	0.00508533	0.00223713	0.00453808	0.00553631	0.00270695	0.00434346	0.00447635	0.0096569	0.00391236	0.005484	0.00541598	0.00365286	0.00368111	0.00433927	0.00213144	0.00403478	0.00482269	0.00405048	0.00557189	0.00415302	0.00514393
NC358	0.0053825	0.00285344	0.00323954	0.0106363	0.00546098	0.0043173	0.00389143	0.00502569	0.00280007	0.00434764	0.00699495	0.00748674	0.00407036	0.0031077	0.00279065	0.00731827	0.00315374	0.00446274	0.00337976	0.00193891	0.00286076	0.00405152	0.00463644	0.00634202	0.00674487	0.00243489	0.00361205	0.00647804	0.00488234	0.0022026	0.00443449	0.00547458	0.00271113	0.00420325	0.00433927	0.00977409	0.00387887	0.00548609	0.00524752	0.00368216	0.00389352	0.004446	0.002144	0.00406408	0.00458098	0.00390608	0.00605531	0.00390817	0.00503092
Oh43	0.00470969	0.00271741	0.00309305	0.00881143	0.00454855	0.00364658	0.00321548	0.00420011	0.00258138	0.00417186	0.00624784	0.0053825	0.00323431	0.00265149	0.00265986	0.00584499	0.00280321	0.00439159	0.00342161	0.00183742	0.00229991	0.00346451	0.00402955	0.00465109	0.00481851	0.00228421	0.00341952	0.00552899	0.00427335	0.0021147	0.00370518	0.00465841	0.00266509	0.00368006	0.00371878	0.00751394	0.0030805	0.00436857	0.0047348	0.00323013	0.00256464	0.00306271	0.00204564	0.0035409	0.00420429	0.00371564	0.00427021	0.00361728	0.00434346
Oh7B	0.00441775	0.00291831	0.00333267	0.00954912	0.00569327	0.0042744	0.00393119	0.00500895	0.00311817	0.00429323	0.00704831	0.00646653	0.00400653	0.00327617	0.00307631	0.0067909	0.00321339	0.00455587	0.00393433	0.00226329	0.00272683	0.00427545	0.00487397	0.00552271	0.0058701	0.00260963	0.00386946	0.00579895	0.00484885	0.00261591	0.0042608	0.00531448	0.00284716	0.00431939	0.00442298	0.00831336	0.00362356	0.00462493	0.0050372	0.00356706	0.00419906	0.00456215	0.00259498	0.00402013	0.00454645	0.00409547	0.00506754	0.00422731	0.00484362
P39	0.00475468	0.00270695	0.00313386	0.00910337	0.0049943	0.0039134	0.00350951	0.00433613	0.00283774	0.00411012	0.00621959	0.00623633	0.00361937	0.00278438	0.0026609	0.00628656	0.00307003	0.00420011	0.00329919	0.00199542	0.00240036	0.00365076	0.00456319	0.00545784	0.00561688	0.00231142	0.00337243	0.00529042	0.00451925	0.00213982	0.00390817	0.00497546	0.00261277	0.00369785	0.00388829	0.00817315	0.00305748	0.0046469	0.00482165	0.0033808	0.00328663	0.00378365	0.00214923	0.0035545	0.00406303	0.00390608	0.00498906	0.00359949	0.00408082
Tx303	0.00516486	0.00278438	0.00318199	0.0105536	0.00528519	0.00426603	0.00360368	0.00478921	0.00286704	0.00434137	0.00665383	0.00680869	0.00382132	0.00301876	0.00284193	0.00678253	0.00311607	0.00467934	0.00366227	0.00196403	0.00241396	0.00390399	0.00464586	0.00603752	0.00632737	0.00245582	0.00347288	0.00638806	0.00448786	0.00221097	0.00410698	0.00529042	0.00260754	0.00426289	0.00401281	0.00882399	0.00368216	0.00507277	0.00474212	0.00327407	0.00373971	0.0041729	0.00225073	0.00413732	0.00459877	0.00389875	0.00570269	0.00371773	0.0050508
Tzi8	0.00429219	0.0024736	0.00423568	0.00861367	0.00424824	0.00447425	0.00328872	0.00703157	0.0024035	0.00452971	0.00655652	0.0099729	0.00492733	0.00270695	0.00249349	0.00958679	0.00290052	0.00697925	0.00295912	0.00166267	0.00283356	0.00349486	0.00424196	0.00527682	0.00545993	0.00213354	0.00313491	0.00512614	0.0043759	0.00198914	0.00375226	0.00489071	0.00217016	0.00379307	0.0038862	0.00824326	0.00333895	0.00456633	0.00485618	0.00286808	0.00319874	0.00371564	0.00179765	0.00311293	0.00422522	0.00364449	0.00495558	0.00388515	0.00423464
[truncated: 373 more columns]
